# Supplementary material
Source: Springer Nature journal article supplement (https://www.springermedizin.de/resource/supplementary/12889_2011_3325_MOESM2_ESM.pdf/9488776)
Supplement: MOESM2 [file 9488776]

## **Both Men and Women**

- Poor health/HIV/ART
- Financial Strain
- Counseling/Education
- MTCT
- Reached desired family size

## **Women**

- Child death
- Older age
- No partner or not a good partner
- Altruism
- Infertility

## **Men**

- Discordance
